# Supplementary material for: Circulating CXCR5+CD4+ T Follicular-Like Helper Cell and Memory B Cell Responses to Human Papillomavirus Vaccines
Source: PubMed Central journal article supplement (PMC4557948; doi:10.1371/journal.pone.0137195), 2015-09-02

**A**

(Vaccination schedule for the two HPV vaccines)

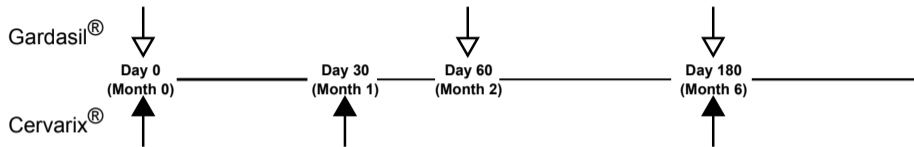**B**

(PBMC samples tested in the flow cytometry experiments)

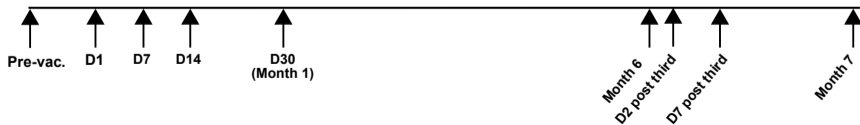

Supplement: pone.0137195.s001.pdf [file pone.0137195.s001.pdf]
