# Supplementary material for: Circulating CXCR5+CD4+ T Follicular-Like Helper Cell and Memory B Cell Responses to Human Papillomavirus Vaccines
Source: PubMed Central journal article supplement (PMC4557948; doi:10.1371/journal.pone.0137195), 2015-09-02

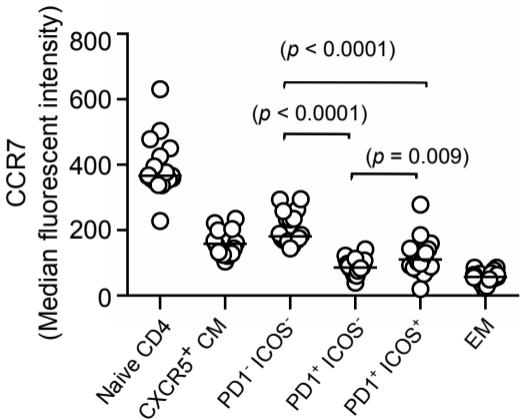

Supplement: pone.0137195.s004.pdf [file pone.0137195.s004.pdf]
